# Supplementary material
Source: Springer Nature journal article supplement (https://www.springermedizin.de/resource/supplementary/40164_2012_10_MOESM4_ESM.pdf/9687008)
Supplement: MOESM4 [file 9687008]

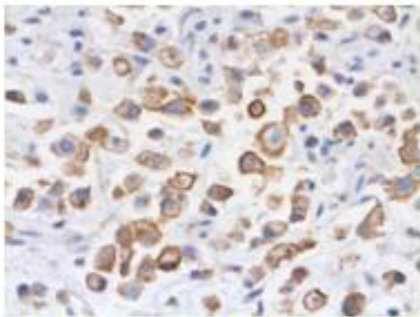

Heart - Metastatic TCC CD138 40X

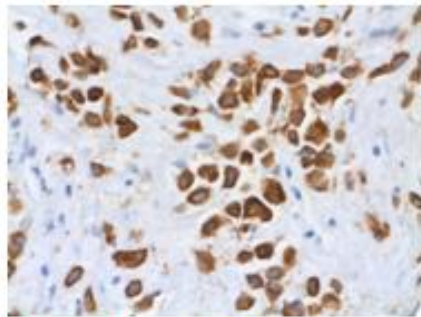

Heart - Metastatic TCC CK7 40X

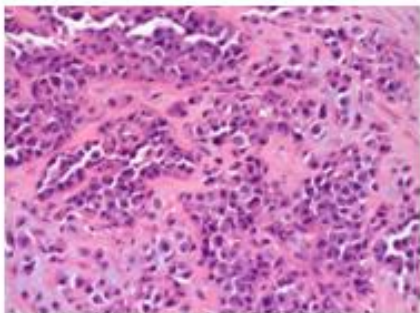

Heart - Metastatic TCC 20x

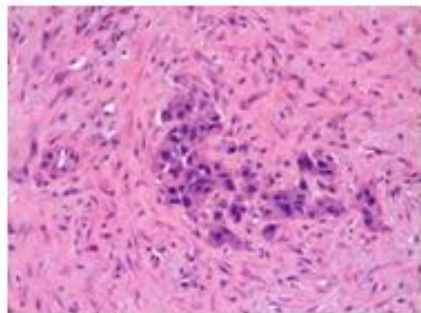

Heart - Metastatic TCC 20x
